# Supplementary material for: Comparative analysis of uranium bioassociation with halophilic bacteria and archaea
Source: PubMed Central journal article supplement (PMC5766140; doi:10.1371/journal.pone.0190953), 2018-01-12
Supplement: pone.0190953.s001.pdf [file pone.0190953.s001.pdf]

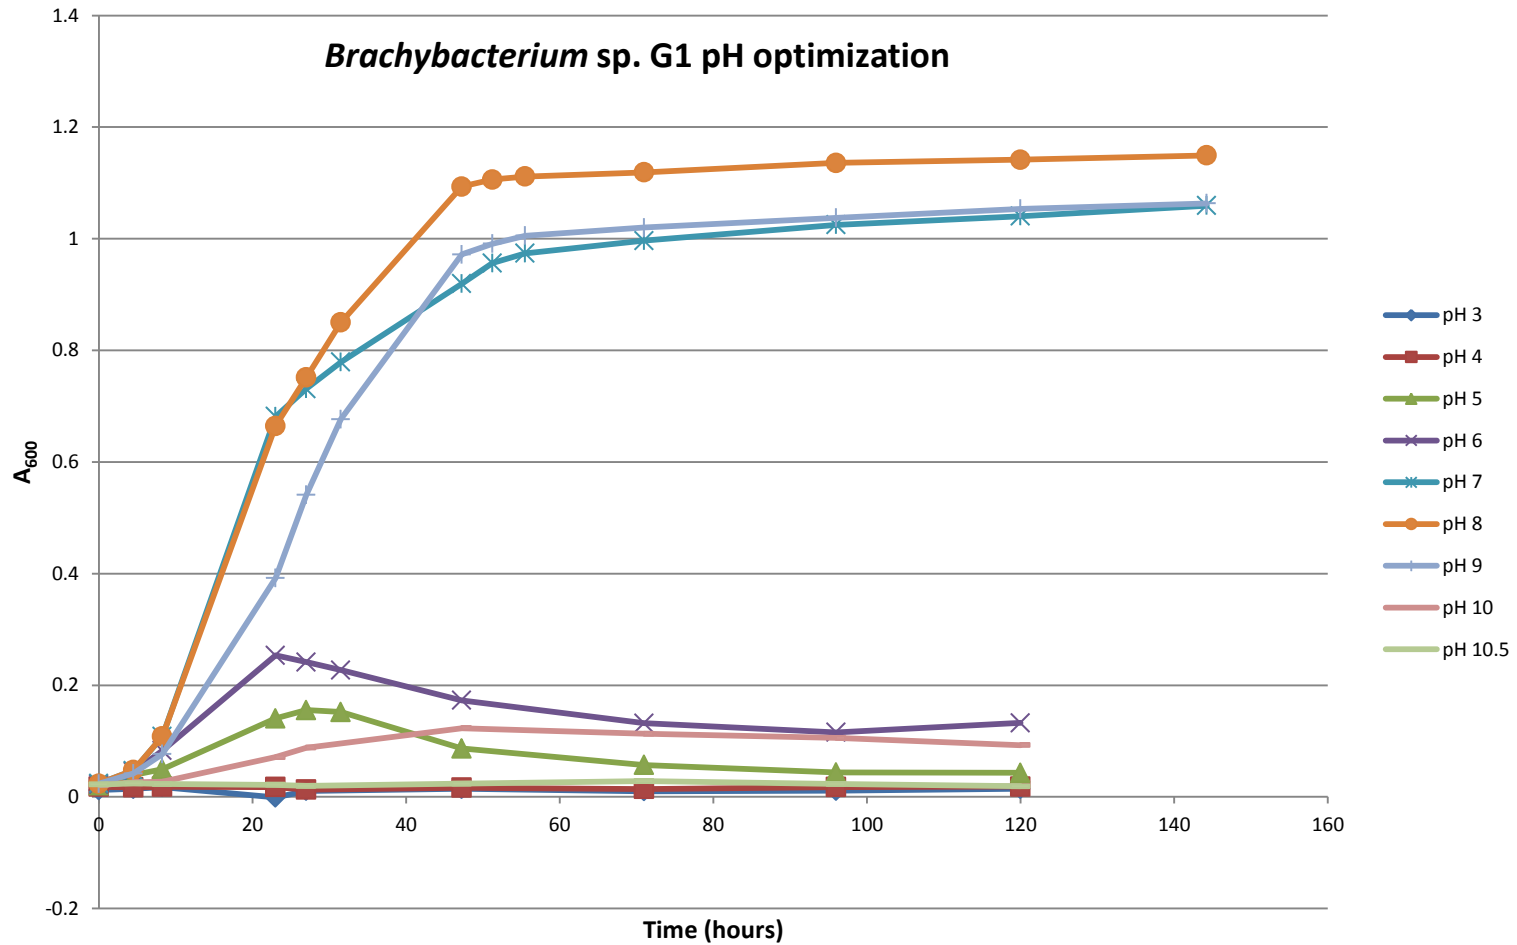

**S1 Fig. Growth of *Brachybacterium sp. G1* as a function of pH. Growth medium was filtered Difco™ Marine Broth 2216 (Becton, Dickinson and Company, United States) with a final NaCl concentration of 4.5% (0.8 M).**
