# Supplementary material for: Comparative analysis of uranium bioassociation with halophilic bacteria and archaea
Source: PubMed Central journal article supplement (PMC5766140; doi:10.1371/journal.pone.0190953), 2018-01-12
Supplement: pone.0190953.s002.pdf [file pone.0190953.s002.pdf]

a) 20  $\mu\text{M}$  U(VI), 2 h

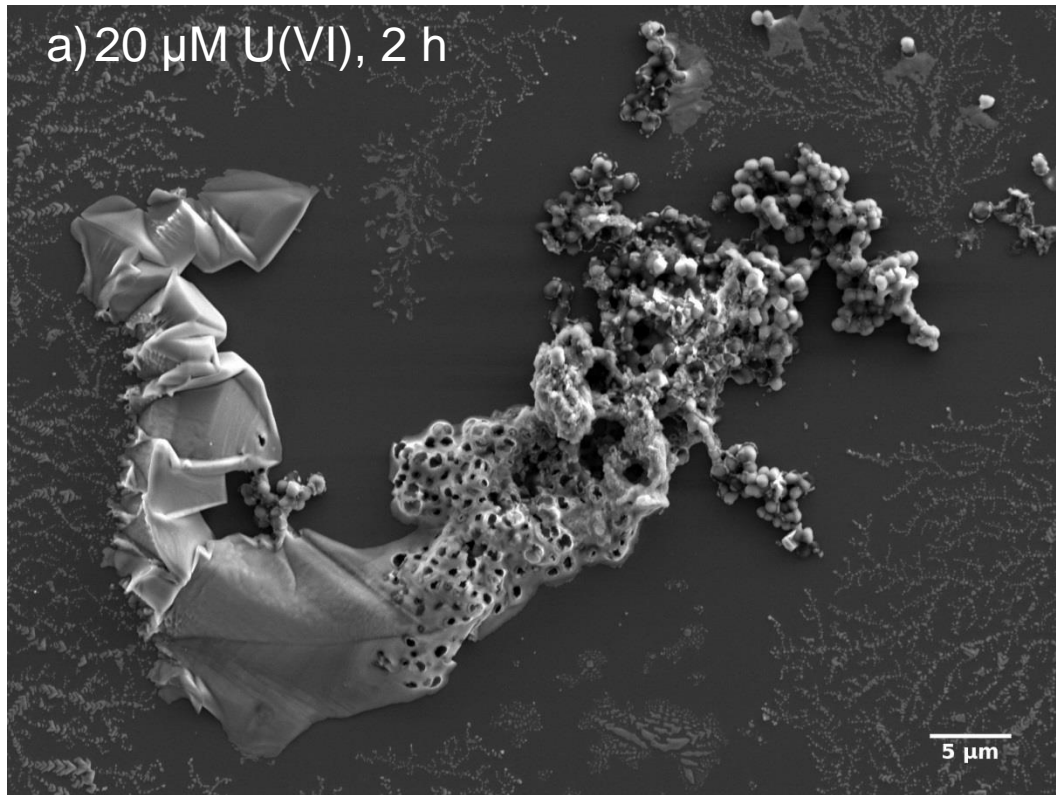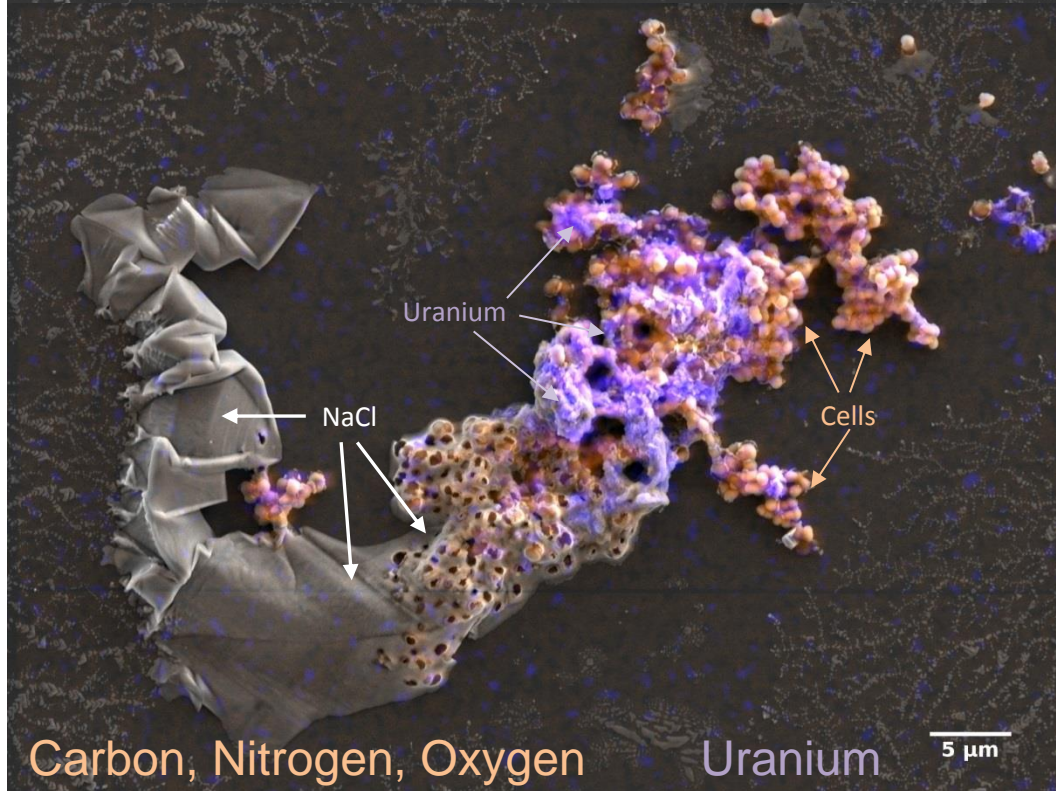

b) 20  $\mu\text{M}$  U(VI), 48 h

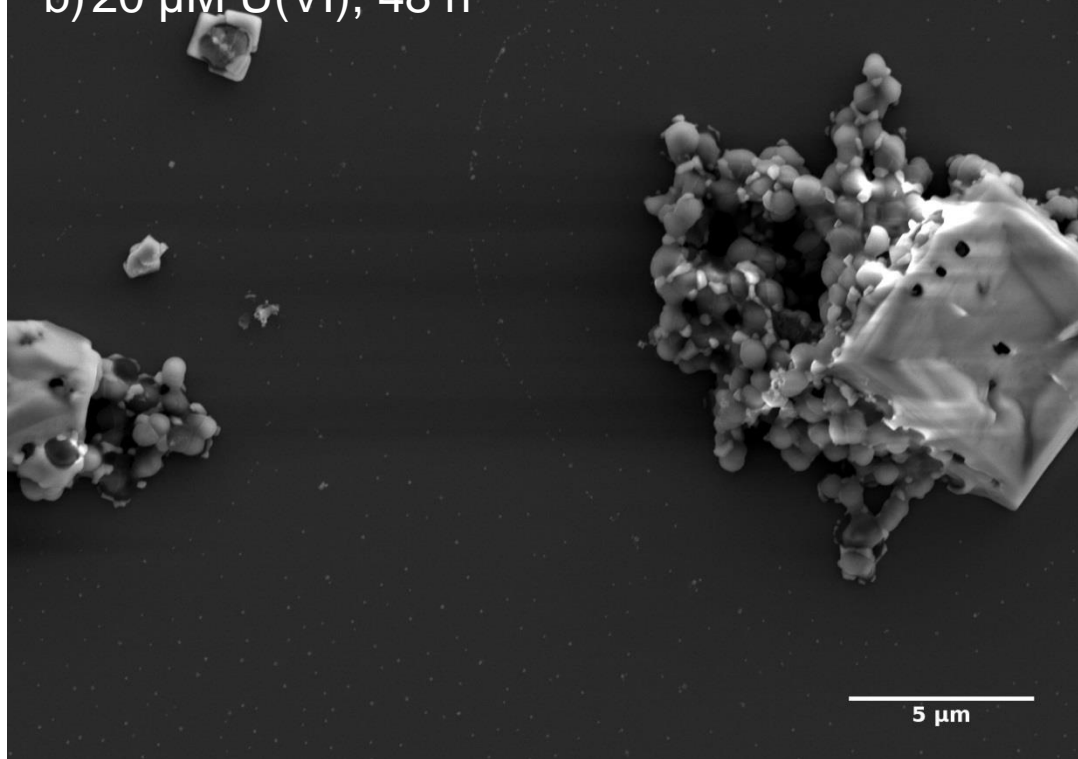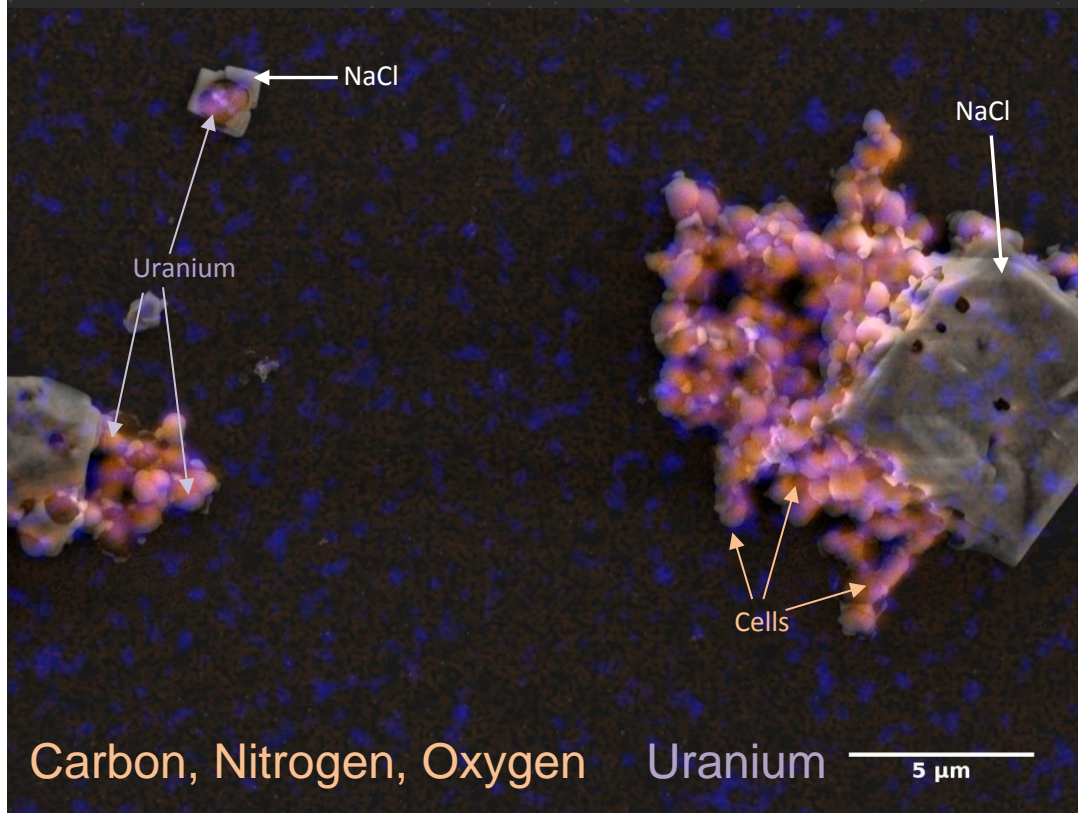



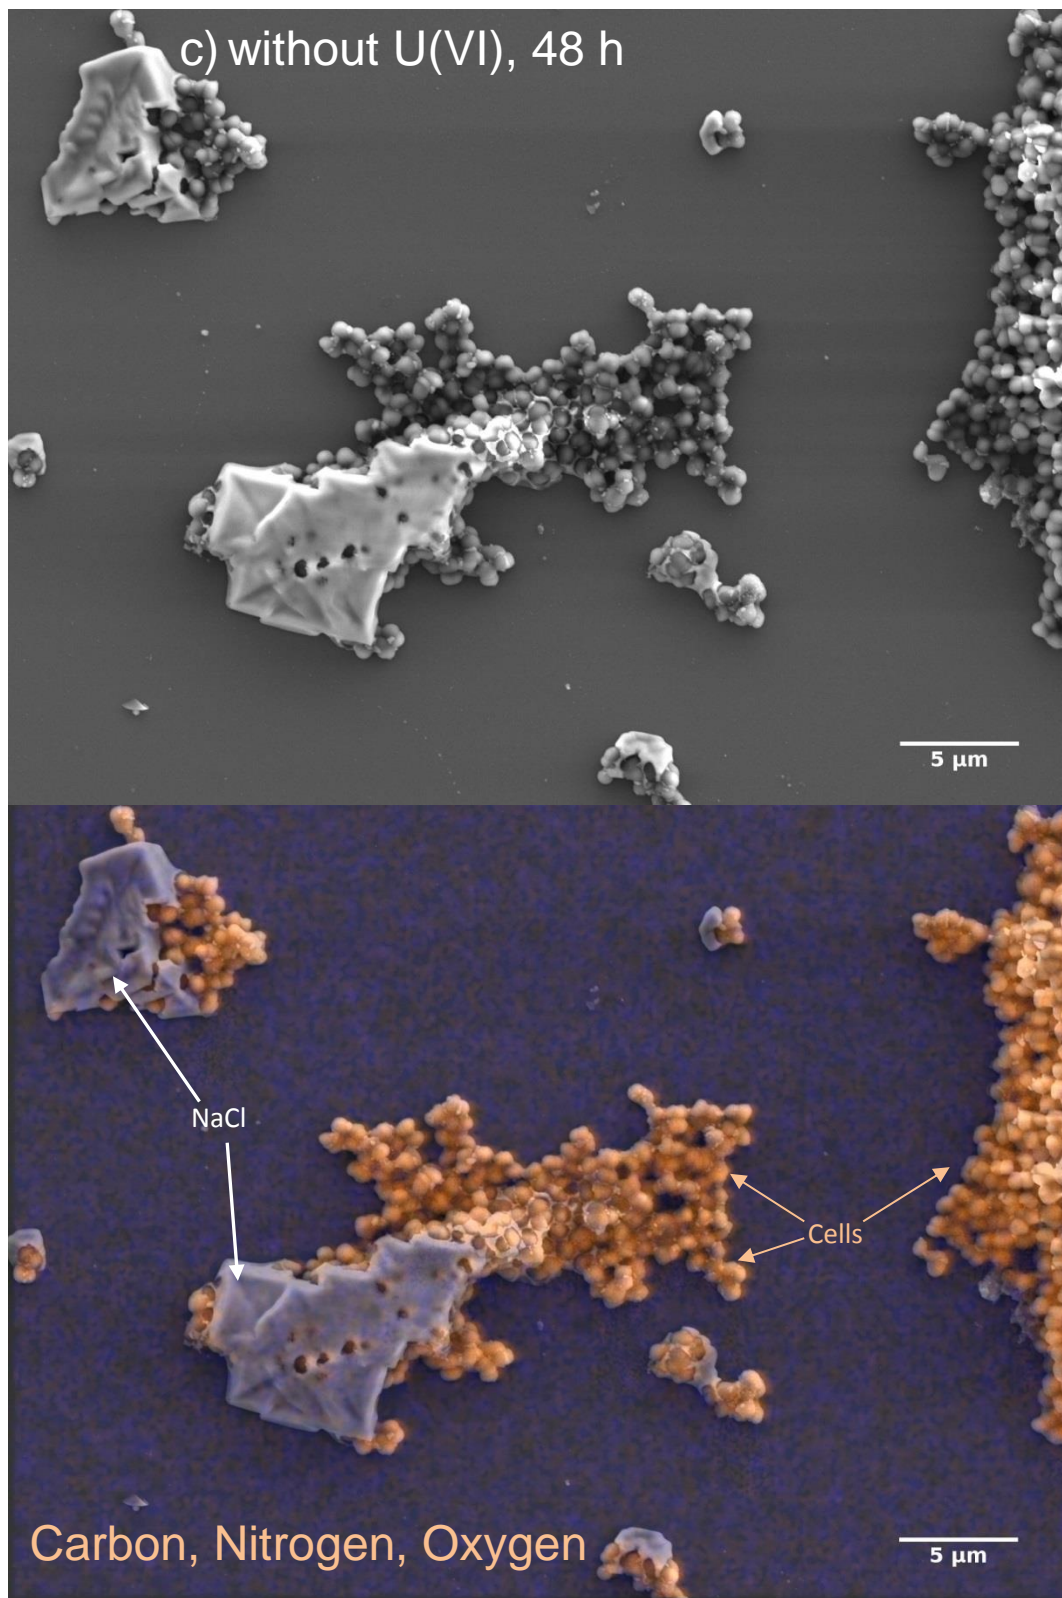

S2 Fig. Electron microscopy images of *Brachybacterium* sp. G1 incubated with uranium (20 μM U(VI), pC<sub>H+</sub> 6, 1.7 M NaCl) for a) 2 h, b) 48 h and c) without uranium for 48 h. Mapping of organic elements (orange, C, N, O) and uranium (blue).
